# Supplementary material for: Total Thrombus-Formation System in Patients with Peripheral Artery Disease
Source: PubMed Central journal article supplement — Clin Appl Thromb Hemost. 2024 Nov 22;30:10760296241301412. doi: 10.1177/10760296241301412 (PMC11585050; doi:10.1177/10760296241301412), 2024-11-22
Supplement: sj-pdf-1-cat-10.1177_10760296241301412.pdf [file sj-pdf-1-cat-10.1177_10760296241301412.pdf]

## Supplementary material

### Supplement to:

### Total Thrombus-Formation System in patients with peripheral artery disease

Christian Pfrepper, Careen Franke, Michael Metze, Maria Weise, Annelie Siegemund, Roland Siegemund, Martin Federbusch, Reinhard Henschler, Sirak Petros, Manuela Konert

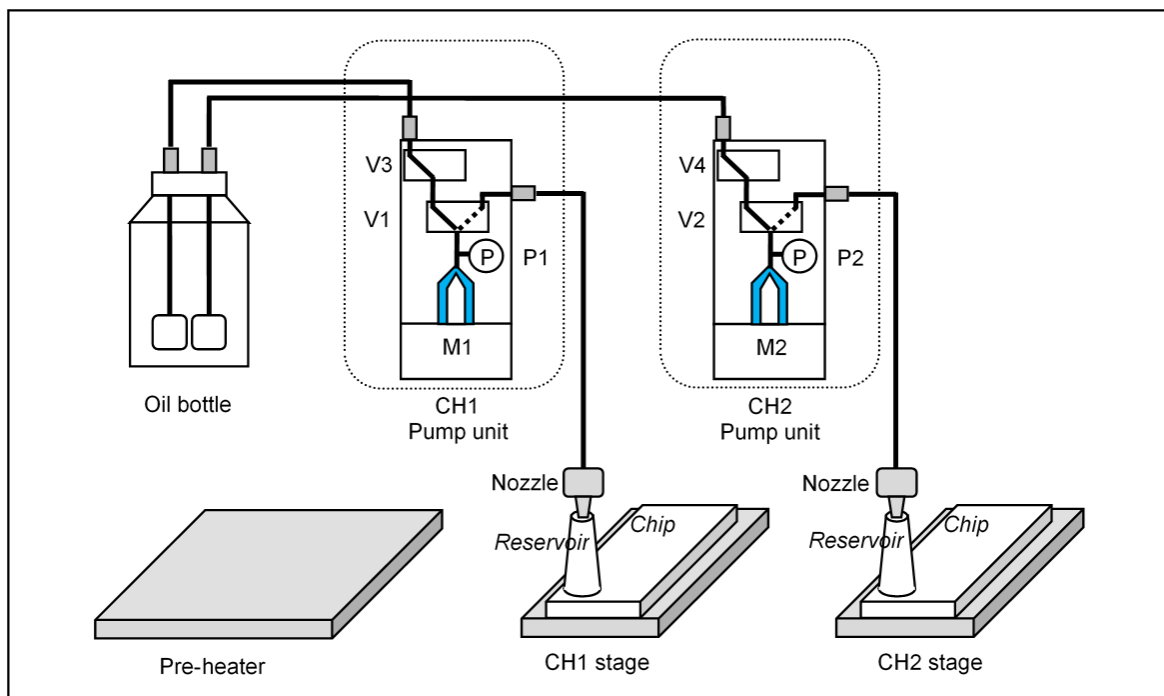

**Supplementary figure 1:** Technical structure of the T-TAS system

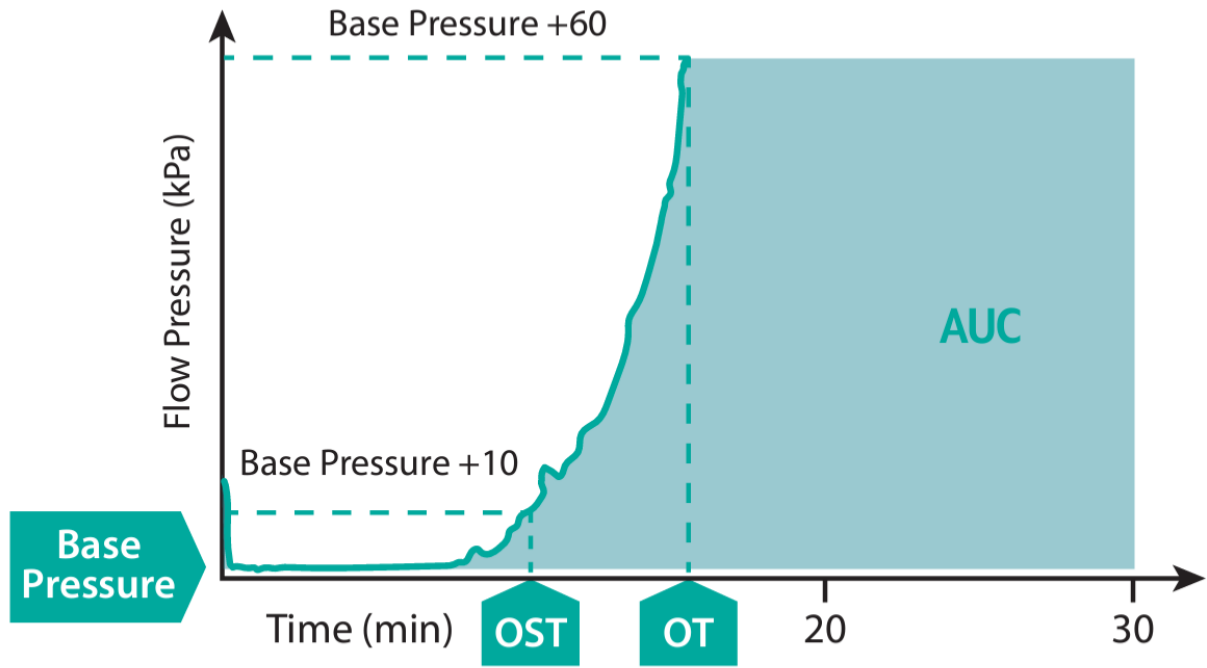

**Supplementary figure 2:** Diagram of an AR-Chip measurement, Abbreviation: OST, occlusion start time; OT, occlusion time; AUC, area und the curve.

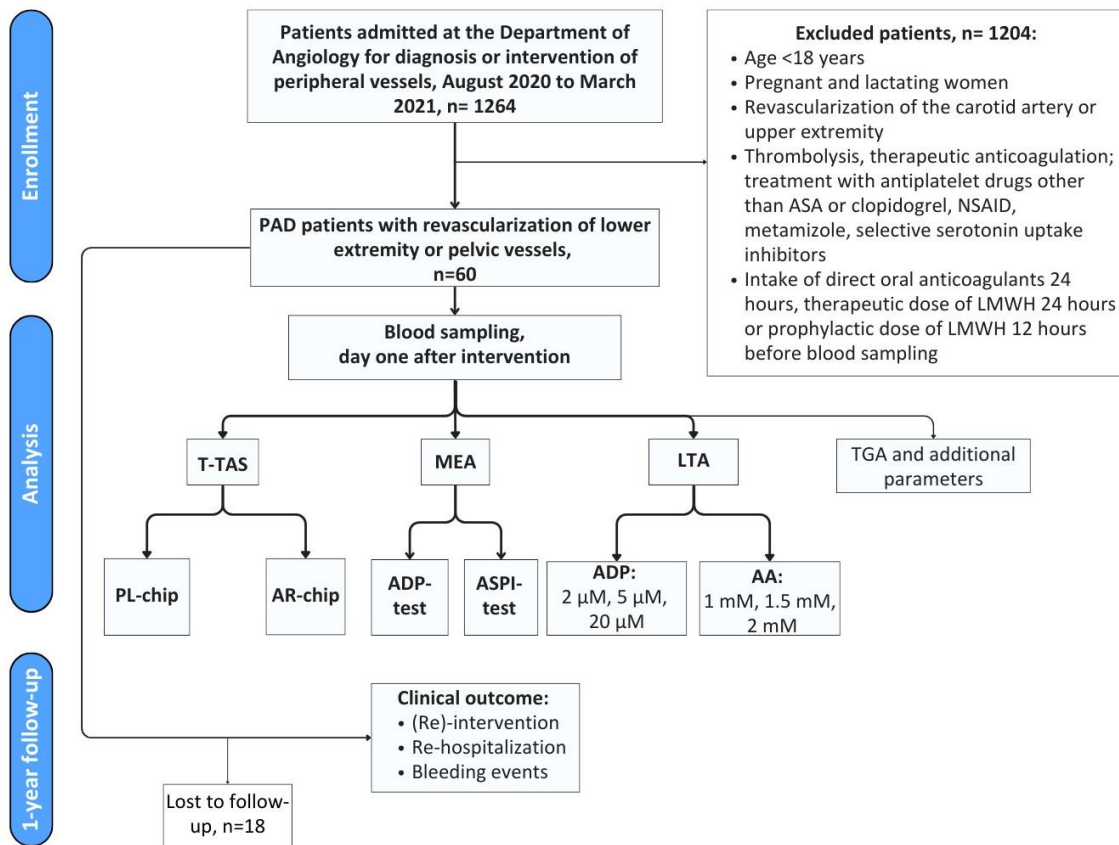

**Supplementary figure 3: Flow chart of the study design.**

Abbreviations: AA, arachidonic acid; ADP, adenosine diphosphate; ASPI-test, acetylsalicylic acid-test; LTA, light transmission aggregometry; MEA, multiple electrode aggregometry; PAD, peripheral artery disease; TGA, Thrombin generation assay; T-TAS, Total Thrombus-formation Analysis System.

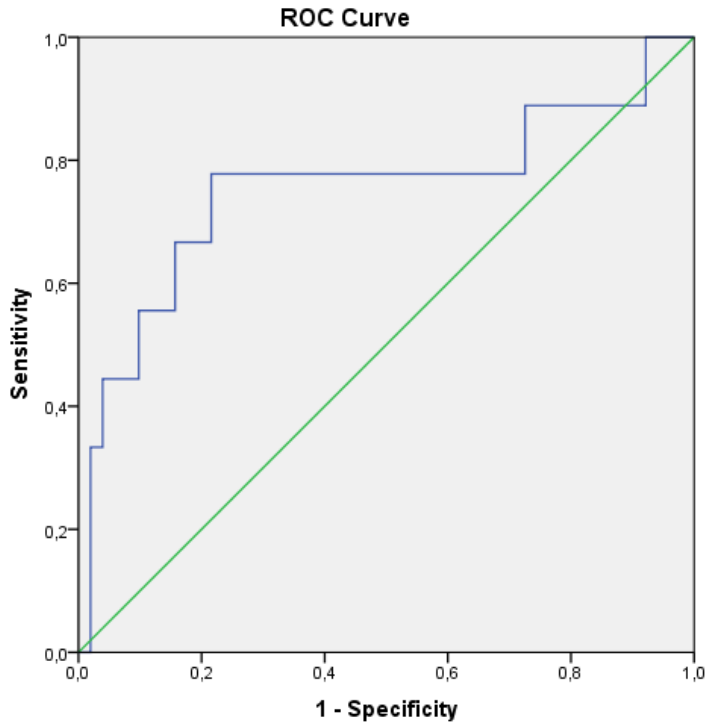

**Supplementary figure 4. ROC-Curve for the area under the curve of the PL-chip (AUC-PL) considering MEA as reference.**

Abbreviations: AUC-PL, area under the curve of the platelet-chip; MEA, multiple electrode aggregometry; ROC, receiver operating characteristic.

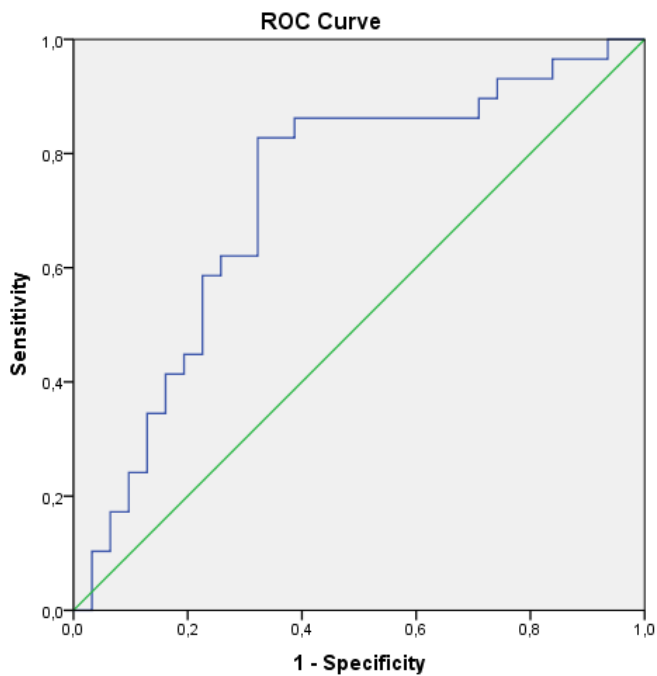

**Supplementary figure 5. ROC-Curve for the area under the curve of the PL-chip (AUC-PL) considering LTA as reference.**

Abbreviations: AUC-PL, area under the curve of the platelet-chip; MEA, multiple electrode aggregometry; ROC, receiver operating characteristic.

**Supplementary table 1. Reference ranges for OST and OT of blood donors for the PL- and AR-chip. All healthy subjects reached OST and OT**

|                                 | PL-chip (n=30) | AR-chip (n=30) |
|---------------------------------|----------------|----------------|
| Mean OST (reference range), sec | 140 (93-203)   | 594 (341-1578) |
| Mean OT (reference range), sec  | 335 (236-537)  | 656 (423-1258) |

Reference ranges are determined as 2.5<sup>th</sup> -97.5<sup>th</sup> percentile.

Abbreviations: AR-chip, atheroma chip; OST, occlusion start time; OT, occlusion time; PL-chip, platelet chip.

**Supplementary table 2. OST and OT in PAD patients the PL- and AR-chip**

|                                       | PL-chip           | AR-chip           |
|---------------------------------------|-------------------|-------------------|
| Median (IQR) OST, sec                 | 152 (IQR 258-433) | 454 (IQR 355-387) |
| Number of samples reaching OST, n (%) | 36 (60%)          | 58 (97%)          |
| Mean (IQR) OT, sec                    | 310 (IQR 258-433) | 540 (IQR 446-692) |
| number of samples reaching OT, n (%)  | 5 (8%)            | 58 (97%)          |

Abbreviations: AR-chip, atheroma chip; OST, occlusion start time; OT, occlusion time; PL-chip, platelet chip; IQR, interquartile range.

**Supplementary table 3. Correlation of MEA- and LTA-tests with AUC-PL and AUC-AR.**

| Parameter |               | Correlation with AUC-PL (p-value) | Correlation with AUC-AR (p-value) |
|-----------|---------------|-----------------------------------|-----------------------------------|
| MEA       | ADP-test      | 0.500 (<0.001)                    | 0.394 (0.002)                     |
|           | ASPI-test     | 0.449 (<0.001)                    | 0.342 (0.008)                     |
| MA LTA    | ADP 20 µmol/L | 0.603 (<0.001)                    | 0.005 (0.971)                     |
|           | ADP 5 µmol/L  | 0.459 (<0.001)                    | 0.069 (0.608)                     |
|           | ADP 2 µmol/L  | 0.103 (0.433)                     | 0.183 (0.166)                     |
|           | AA 1 mmol/L   | 0.135 (0.304)                     | 0.437 (0.001)                     |
|           | AA 1.5 mmol/L | 0.072 (0.584)                     | 0.358 (<0.005)                    |
|           | AA 2 mmol/L   | 0.012 (0.929)                     | 0.278 (0.033)                     |

Correlation coefficient r is Spearman's rho.

Abbreviations: AA, arachidonic acid; ADP, adenosine diphosphate; ASPI-test, acetylsalicylic acid-test; AUC-AR, area under the curve of the AR-chip; AUC-PL, area under the curve of the PL-chip; LTA, light transmission aggregometry; MA, maximum aggregation; MEA, multiple electronic aggregometry.

**Supplementary table 4. Number of aggregation tests outside the target range and comparison of the area under the curve (AUC) of the PL chip for patients inside or outside the target range, including double low responders in each single aggregation test.**

| Test |                             | Outside target range, n (%) | AUC-PL inside target, median (IQR) | AUC-PL outside target, median (IQR) | p      |
|------|-----------------------------|-----------------------------|------------------------------------|-------------------------------------|--------|
| MEA  | ASPI-test <sup>1</sup>      | 6 (10.0)                    | 69 (19-158)                        | 221 (133-380)                       | 0.023  |
|      | ADP-test <sup>1</sup>       | 5 (8.3)                     | 70 (19-165)                        | 237 (90-412)                        | 0.034  |
|      | ADP and ASPI-test           | 2 (3.3)                     | 69 (18-142)                        | 237, 425*                           | 0.008  |
| LTA  | ADP 20 $\mu$ M <sup>1</sup> | 28 (46.7)                   | 31 (11-92)                         | 148 (70-208)                        | <0.001 |
|      | AA 2 mM <sup>1</sup>        | 10 (16.7)                   | 69 (19-167)                        | 120 (55-191)                        | 0.362  |
|      | AA and ADP                  | 8 (13.3)                    | 32 (11-113)                        | 161 (70-222)                        | 0.440  |

\* Absolute values. <sup>1</sup> Including cases of single low response plus cases of double low response.

Abbreviations: AA, arachidonic acid; ADP, adenosine diphosphate; ASPI-test, acetylsalicylic acid-test; AUC-PL, area under the curve of the PL-chip; IQR, interquartile range; LTA, light transmission aggregometry; MEA, multiple electronic aggregometry.

**Supplementary table 5. Median values of additional hemostatic parameter and thrombin generation assay and their correlation (Spearman's rho) with AUC-PL and AUC-AR.**

| Parameter                      |                         | Median | IQR       | Correlation with AUC-PL, (p-value) | Correlation with AUC-AR, (p-value) |
|--------------------------------|-------------------------|--------|-----------|------------------------------------|------------------------------------|
| d-dimers (mg/L)                |                         | 0.97   | 0.65-1.51 | 0.168 (0.200)                      | 0.379 (0.003)                      |
| aPTT (s)                       |                         | 30.5   | 28.6-32.6 | 0.105 (0.427)                      | 0.133 (0.315)                      |
| Fib (g/L)                      |                         | 5.9    | 5.3-6.3   | 0.038 (0.776)                      | 0.021 (0.879)                      |
| FVIII (%)                      |                         | 183    | 160-197   | 0.114 (0.384)                      | 0.095 (0.472)                      |
| vWF:Ag (%)                     |                         | 230    | 200-263   | 0.082 (0.535)                      | 0.078 (0.557)                      |
| vWF:Ac (%)                     |                         | 247    | 198-317   | 0.091 (0.488)                      | 0.212 (0.106)                      |
| Prothrombin fragments (pmol/L) |                         | 322    | 220-433   | 0.033 (0.803)                      | 0.051 (0.699)                      |
| Lp(a) (nmol/L)                 |                         | 22.3   | 20-119    | 0.126 (0.409)                      | 0.051 (0.740)                      |
| Thrombin generation            | Lagtime (min)           | 2.7    | 2-3       | 0.011 (0.934)                      | 0.073 (0.581)                      |
|                                | ETP (nMxmin)            | 2136   | 1878-2315 | 0.023 (0.864)                      | 0.013 (0.924)                      |
|                                | Peak (nM)               | 371    | 341-401   | 0.092 (0.483)                      | 0.100 (0.452)                      |
|                                | Time to peak (min)      | 5.4    | 4.7-6.3   | 0.06 (0.646)                       | 0.019 (0.452)                      |
|                                | Velocity index (nM/min) | 137    | 109-154   | 0.071 (0.590)                      | 0.052 (0.698)                      |

Abbreviations: aPTT, activated partial thromboplastin time; AUC-PL, area under the curve of the PL-chip; AUC-AR, area under the curve of the AR-chip; ETP, endogenous thrombin potential; FVIII, factor VIII activity; IQR, interquartile range; Lp(a), lipoprotein (a); vWF:Ac, von Willebrand factor activity; vWF:Ag, von Willebrand factor antigen.

Supplementary table 6. Number of cases inside and outside the target range in MEA and LTA for a) both ADP and AA/ASPI-tests b) ASPI/AA-tests c) ADP-tests.

| A                        |               | MEA ASPI- and ADP-test (n) |               |           |
|--------------------------|---------------|----------------------------|---------------|-----------|
|                          |               | Above cut-off              | Below cut-off | Total (n) |
| LTA AA- and ADP-test (n) | Above cut-off | 5                          | 24            | 29        |
|                          | Below cut-off | 4                          | 27            | 31        |
| Total (n)                |               | 9                          | 51            | 60        |
| B                        |               | MEA ASPI-test (n)          |               |           |
|                          |               | Above cut-off              | Below cut-off | Total (n) |
| LTA AA-test (n)          | Above cut-off | 3                          | 7             | 10        |
|                          | Below cut-off | 3                          | 47            | 50        |
| Total (n)                |               | 6                          | 54            | 60        |
| C                        |               | MEA ADP-test (n)           |               |           |
|                          |               | Above cut-off              | Below cut-off | Total (n) |
| LTA ADP-test (n)         | Above cut-off | 3                          | 25            | 28        |
|                          | Below cut-off | 2                          | 30            | 32        |
| Total (n)                |               | 5                          | 55            | 60        |

Abbreviations: AA, arachidonic acid; ADP, adenosine diphosphate; ASPI-test, acetylsalicylic acid-test; LTA, light transmission aggregometry; MEA, multiple electronic aggregometry.
